## 2 **Left-right leaf asymmetry in decussate and distichous phyllotactic systems**

3

4

5 Ciera C. Martinez<sup>\*1</sup>, Daniel H. Chitwood<sup>\*2</sup>, Richard S. Smith<sup>3,4</sup>, Neelima R. Sinha<sup>#,5</sup>

6

7 <sup>\*</sup>These authors contributed equally.

8 <sup>1</sup>Dept. of Molecular & Cell Biology, University of California, Berkeley, Berkeley, CA 94720

9 USA.

10 <sup>2</sup>Donald Danforth Plant Science Center, St. Louis, MO 63132 USA.

11 <sup>3</sup>Department of Comparative Development and Genetics, Max Planck Institute for Plant  
12 Breeding Research, Cologne, 50829 Germany.

13 <sup>4</sup>Institute of Plant Sciences, University of Bern, CH-3013 Bern, Switzerland

14 <sup>5</sup>Department of Plant Biology, University of California, Davis, Davis, CA 95616 USA.

15

16 **KEYWORDS:** Plant development, symmetry, auxin, phyllotaxy, leaf development, phyllotaxy

17

18

19

20

21

22

23

24

25

26

27 <sup>#</sup>To whom correspondence should be addressed:

28 Neelima R. Sinha

29 Department of Plant Biology

30 1002 Life Sciences

31 One Shields Ave.

32 Phone: (530) 754-8441

33 Fax: (530) 752-5410

34 e-mail: nrsinha @ ucDavis.edu

35

36 ABSTRACT

37 Leaves in plants with spiral phyllotaxy exhibit directional asymmetries, such that all the leaves  
38 originating from a meristem of a particular chirality are similarly asymmetric relative to each  
39 other. Models of auxin flux capable of recapitulating spiral phyllotaxis predict handed auxin  
40 asymmetries in initiating leaf primordia with empirically verifiable effects on superficially  
41 bilaterally symmetric leaves. Here, we extend a similar analysis of leaf asymmetry to decussate  
42 and distichous phyllotaxy. We found that our simulation models of these two patterns predicted  
43 mirrored asymmetries in auxin distribution in leaf primordia pairs. To empirically verify the  
44 morphological consequences of asymmetric auxin distribution, we analyzed the morphology of a  
45 tomato *sister-of-pinformed1a* (*sopin1a*) mutant, *entire-2*, in which spiral phyllotaxy consistently  
46 transitions to a decussate state. Shifts in the displacement of leaflets on the left and right sides of  
47 *entire-2* leaf pairs mirror each other, corroborating predicted model results. We then analyze the  
48 shape of >800 common ivy (*Hedera helix*) and >3,000 grapevine (*Vitis* and *Ampelopsis* spp.) leaf  
49 pairs and find statistical enrichment of predicted mirrored asymmetries. Our results demonstrate  
50 that left-right auxin asymmetries in models of decussate and distichous phyllotaxy successfully  
51 predict mirrored asymmetric leaf morphologies in superficially symmetric leaves.

52

53 INTRODUCTION

54 Leaf shape is defined across four axes. Asymmetry is usually obvious along three of these  
55 axes—the proximal-distal, abaxial-adaxial, and medio-lateral (**Figure 1A**), while asymmetry  
56 along a fourth axis, which describes the left and right halves of a leaf (**Figure 1B**), is rarely  
57 explored. Most leaves are thought to be either truly bilaterally symmetric (i.e., each side of the  
58 leaf mirrored along the midrib) or if asymmetry is observed, on average this asymmetry cancels

59 out. Fluctuating asymmetry observed along the left/right axis of leaves has been attributed to  
60 noise created from random errors during development, influenced by environmental stresses [1–  
61 3]. Random noise in development can be assumed if the average difference between the left and  
62 right sides is zero, but if there is a consistent shift in asymmetry on one side compared to the  
63 other, directionalized asymmetry may be occurring [4].

64  
65 Recent work using sensitive techniques to measure leaf shape has suggested that directionalized  
66 asymmetry along the left and right side of the leaf may be more prevalent than once believed.  
67 Although superficially bilaterally symmetric, Elliptical Fourier Descriptor analysis in  
68 *Arabidopsis thaliana*, in addition to simple measurements in the shifts between leaflet placement  
69 along the left and right sides of *Solanum lycopersicum* (tomato) leaves, reveals that plants in  
70 these species produce leaves biased to be left- or right-handed [5]. The asymmetry of leaves is  
71 dependent on the handedness of the plant from which they originate. Handedness in plants arises  
72 when the phyllotaxy (the angular arrangement of initiated leaves and other lateral organs on a  
73 plant) is spiral (i.e., the angle between initiating leaves is approximately the golden angle,  
74  $\sim 137.5^\circ$ ). In reference to a “bottom-up” view of leaf initiation events, the spiral can form in two  
75 directions, either “clockwise” (C) or “counter-clockwise” (CC) (**Figure 1C**). The observation  
76 that leaf morphological features are asymmetrically skewed in relation to spiral phyllotactic  
77 patterning has been described in exceptionally asymmetric species with respect to features such  
78 as venation patterning, leaf shape, curling, coiling, and resupination [6, 7]. Notably, many of the  
79 examples in the previous references are from the Zingiberales, including banana (*Musa*) and  
80 *Calathea*, reported to have a fixed phyllotactic handedness [7, 8]. The left and right sides of a  
81 leaf in plants with spiral phyllotaxy therefore appear to possess intrinsic asymmetries influenced

82 by whether the phyllotaxy of the plant is clockwise or counter-clockwise (**Figure 1C**). To reflect  
83 the orientation of a leaf relative to the spiral phyllotactic direction, various terminologies have  
84 been proposed [7, 9–11]. In this paper, the leaf half which faces towards emerging leaves will be  
85 described as ascending, while the half facing the older leaves is the descending side (**Figure 1C**).

86

87 Modeling and experimental approaches have shown that phyllotactic patterning is largely  
88 determined by the localization of the plant hormone auxin [12, 13]. Regions of high auxin  
89 concentration determine sites of leaf initiation and the positional information of many other leaf  
90 features during morphogenesis, including vasculature, leaflets, and the development of the  
91 margin [14, 15]. The dynamics of auxin flux in spiral phyllotactic systems are such that it is  
92 predicted that auxin would be depleted from the ascending side of older primordia and supplied  
93 to the descending side of younger primordia. This prediction was verified both in existing auxin  
94 flux models of the shoot apical meristem (that have provided foundational insights into the self-  
95 organizing mechanisms by which auxin flux creates phyllotactic patterns) and empirically, by  
96 looking at the asymmetric shape features of initiating and mature leaves and the distribution of  
97 auxin reporter activity in leaf primordia [5]. While leaf asymmetry is guided by biased auxin  
98 distribution during spiral phyllotactic patterning, no one has explored how leaf asymmetries  
99 manifest in plants which display other phyllotactic patterns.

100

101 While the most common phyllotactic pattern in the plant kingdom is spiral, phyllotaxy can take  
102 on a multitude of orientations, including decussate and distichous. In decussate patterns pairs of  
103 leaves initiate at the same time  $180^\circ$  apart with subsequent leaf pairs initiating at  $90^\circ$  from  
104 previous pair (**Figure 1E**). Distichous phyllotaxy is similar except leaves initiate one at a time, at  
105 a divergence angle of  $180^\circ$  (**Figure 1F**). In spiral systems the left-right axis is fixed and the

106 developmental context of each side of a primordium depends on phyllotactic chirality, but in  
107 decussate and distichous phyllotaxy, the potential relationship between asymmetry in leaves  
108 relates to their initiation as pairs.

109

110 To explore the asymmetric nature of leaves arising from decussate and distichous systems, we  
111 asked if leaf asymmetries exist using both modeling and empirical approaches. We first revisited  
112 an auxin flux model that is capable of recapitulating decussate and distichous phyllotaxy. We  
113 found that there are predicted auxin asymmetries in initiating decussate and distichous leaf  
114 primordia pairs (that is, the divergence angle between the pair is  $\sim 180^\circ$ ) such that auxin falls on  
115 opposite sides of each leaf. Curious if such a mirrored relationship is empirically supported, we  
116 took advantage of a recently characterized *sister-of-pin-formed1a* (*sopin1a*) mutant in tomato,  
117 *entire-2* (*e-2*), that displays a consistent decussate phyllotaxy at early nodes [16]. Leaf pairs in *e-*  
118 *2* exhibit mirrored shifts in the displacement of leaflets on the left and right sides of the leaf,  
119 verifying modeled predictions. We then analyze the morphology of >800 distichous leaf pairs  
120 using Elliptical Fourier Descriptors in common ivy (*Hedera helix*) and find a statistical  
121 enrichment for successive leaves to have opposite asymmetry above that expected by chance. A  
122 similar analysis using homologous Procrustes-adjusted landmarks in >3,000 leaf pairs from 20  
123 different species and hybrids of grapevine (*Vitis* and *Ampelopsis* spp.) shows that the predicted  
124 mirrored asymmetries in successive leaves are particularly strong in this group. Our results show  
125 that even in decussate and distichous species seemingly lacking directional asymmetries, models  
126 of asymmetric auxin flux successfully predict left-right asymmetries in mature leaves.

127

128 RESULTS

129 **Modeling predicts mirrored IAA shifts between pairs of leaves in decussate and distichous**  
130 **phyllotaxy**

131 Previous work asked if there are differences in auxin localization with respect to initiating leaf  
132 primordia using models capable of simulating spiral phyllotactic patterning [5]. We re-visit this  
133 model, which is capable of predicting many phyllotactic patterns, including spiral, decussate, and  
134 distichous [13]. The model works by simulating known mechanisms that direct leaf initiation  
135 events. The simulation reiterates through several steps. 1. Directional auxin transport by the  
136 action of the auxin efflux transporter, PIN-FORMED1 (PIN1), which directs auxin towards  
137 neighboring cells with the highest auxin concentration. 2. Auxin accumulates to convergence  
138 points. 3. Once auxin levels reach a certain threshold, auxin is transported inward beginning leaf  
139 initiation on the periphery of the simulated shoot apical meristem (SAM). Unlike the spiral and  
140 decussate models, in the distichous model the original equations from Smith and co-workers are  
141 stable enough to be used such that original transport equations, rather than those assuming no  
142 primordium differentiation, are used without *PIN* polarity bias in primordium cells. Thus our  
143 methods here are independent of the particular choice of transport equation, as several have been  
144 proposed [13, 17, 18].

145  
146 The analysis of decussate and distichous systems is different from spiral phyllotaxis, as pairs of  
147 primordia are analyzed for relationships between their divergence angles and IAA Shift values.  
148 For the decussate system, a pair of leaves has to be preceded by a divergence angle between  $70^\circ$   
149 and  $100^\circ$ , and the pair itself requires a divergence angle  $>150^\circ$ . In the distichous system, a “pair”  
150 of leaves consists of two successive leaves in which the divergence angle is  $>130^\circ$ . To facilitate  
151 analysis, divergence angles were converted to a positive sign that forces a similar orientation in

152 all leaf primordia pairs. We then analyzed the relationships between divergence angles and IAA  
153 Shift values (the deviation of the center of mass of auxin distribution in a leaf primordium  
154 relative to the divergence angle) between “primordium A” and “primordium B” (see **Figure 2A**).  
155 If IAA Shift values between a pair of distichous or decussate primordia are of the same sign (e.g.  
156 shifting clockwise in both primordia, or counter-clockwise in both primordia) then we expect  
157 auxin maxima to fall on the same side of each primordium such that they are of a “pinwheel”  
158 orientation (**Figure 2B**). Contrastingly, if the IAA Shift values between primordium A and B are  
159 opposite in sign, the auxin maxima fall on mirroring sides of a primordia pair, forming a  
160 “mirror” orientation (**Figure 2C**). In both decussate and distichous models, we find that IAA  
161 Shifts form a mirroring pattern within primordia pairs (**Figure 2D-F**). In primordium A, as the  
162 divergence angle decreases from the ideal  $180^\circ$ , IAA Shift values decrease and become negative,  
163 whereas in primordium B as the divergence angle decreases, IAA Shift values increase and  
164 become significantly positive. The results show that as decussate or distichous pairs of leaves  
165 deviate from an ideal  $180^\circ$  divergence angle the auxin peak concentrations remain truer to  $180^\circ$ ,  
166 creating mirror image pairs of primordia as in (**Figure 2C**) that is often empirically observed, as  
167 in distichous arrangements of *Begonia* leaves (**Figure 2G**).

168

169 **Decussate *e-2* tomato plants display mirrored asymmetries in leaflet position but not**  
170 **terminal leaflet shape**

171

172 We investigated if auxin asymmetries observed in the decussate model had empirical  
173 consequences for leaf morphology in a tomato mutant. Ideally, hypotheses regarding the effects  
174 of different phyllotactic systems would not be made between disparate species (such as tomato  
175 and *Begonia*) but within a single species. Although mutations that create aberrant phyllotaxis are

176 commonplace, those that produce true transformations from one stable phyllotactic patterning  
177 form to another are exceedingly rare [19]. We took advantage of the *e-2* mutation, which has  
178 been shown to display decussate-like phyllotaxis, where the divergence angle between leaves 1  
179 and 2 and leaves 3 and 4 approaches 180°, but the angle between leaves 2 and 3 is much smaller  
180 (**Figure 3A-B**) [16].

181  
182 In our previous study [5], the displacement of leaflet position between the left and right sides of  
183 the tomato compound leaf was a strong indicator of asymmetry and predicted auxin distributions  
184 from the spiral phyllotactic model. For those decussate pairs formed from the first two leaves for  
185 which there were leaflets to measure (n=113), we measured the difference in distance from the  
186 terminal leaflet to the first distal lateral leaflet between the left and right side of *e-2* leaves  
187 (**Figure 3C**). The direction of the asymmetry of the displacement of leaflets was strongly  
188 opposite and mirrored between leaves 1 and 2 in *e-2*, which form a divergence angle greater than  
189 that found in wild-type and closer to 180° (**Figure 3B**). The correlation between the left-right  
190 displacement in leaves 1 and 2 in *e-2* is strongly negative ( $r = -0.51$ ,  $p = 8 \times 10^{-9}$ ,  $n=113$ ) (**Figure**  
191 **3D**), confirming the mirrored relationship between pairs predicted by modeling (**Figure 2D**), and  
192 distinctly different from the leaflet displacement in the same direction common to leaves arising  
193 from wild-type tomato plants with spiral phyllotaxy as we have shown previously [5].

194  
195 In our previous work on spiral phyllotaxy, we had analyzed terminal leaflet shapes using  
196 Elliptical Fourier Descriptors (EFD) and found that leaves arising from plants of a particular  
197 handedness were asymmetric in a similar direction. Analyzing leaf1/leaf2 pairs in *e-2*, we asked  
198 whether an opposite orientation in asymmetric leaflet shape occurred more frequently than a  
199 similar orientation by chance (**Figure 4A**), as predicted by the “mirrored” orientation observed in



200 our model (**Figure 2D**). To do so, we isolated the asymmetric sources of EFD variance (**Figure**  
201 **4B**) and asked how often each resulting Principal Component (PC) was of the opposite or same  
202 sign between leaf1/leaf2 pairs in *e-2*. A one-tailed Fisher's exact test (in the direction of the  
203 alternative hypothesis of more opposite pairs relative to same, assuming equal numbers) fails to  
204 achieve significance, leaving the modeled hypothesis of mirrored asymmetry unconfirmed with  
205 respect to terminal leaflet shape (**Table 1**).

206

207 The mirrored relationship in terminal leaflet pairs may have failed to achieve significance for any  
208 number of reasons, including a subtle effect not detected because of insufficient replication ( $n =$   
209 183, which is small compared to the replication measured for common ivy or grapevine species,  
210 see below) or that directionalized asymmetry may only be observed in leaflet displacement  
211 (**Figure 3D**) and not terminal leaflet shape. This last hypothesis is intriguing, considering that for  
212 all PCs, more same orientations were observed than opposite (**Table 1**). Considering that tomato  
213 is a spiral phyllotactic species and that this is a mutant, perhaps the spiral-phyllotactic tendency  
214 for terminal leaflet asymmetries to be of the same sign [5] is preserved in an *e-2* genetic  
215 background. Regardless, the mirrored displacements in leaflet position (**Figure 3C-D**) are  
216 predictive of the modeled mirror relationship (**Figure 2D**) and distinct from what we had  
217 previously observed in leaflet position in a wild type background [5], suggesting that some leaf  
218 features are affected more by the *e-2* decussate transformation than others.

219

220 **Alternating leaf asymmetry in the distichous phyllotaxy of common ivy (*Hedera helix*) and**  
221 **grapevine (*Vitis* and *Ampelopsis* spp.)**

222 To test whether the modeled mirrored predictions for distichous phyllotaxy (**Figure 2F**) are  
223 empirically observable, we turned to distichous vine species, which present numerous numbers  
224 of paired, successive nodes to test our hypotheses.

225

226 We analyzed 824 leaf pairs of a single genotype of common ivy (*Hedera helix*) growing up a  
227 >6m concrete wall enclosing a courtyard at the Donald Danforth Plant Science Center in St.  
228 Louis, MO (**Figure 5A**). Asymmetric shape variance was quantified using Elliptical Fourier  
229 Descriptors (EFDs) (**Figure 5B**). For the first four asymmetric Principal Components (PCs)  
230 explaining 87.5% of asymmetric shape variance, more opposite than same signed relationships  
231 were detected between leaf pairs (**Table 2**). However, only for PCs 2 and 3 was the occurrence  
232 of opposite-signed leaf pairs significantly greater than that of same-signed pairs at a p value less  
233 than the  $\alpha$  level of 0.05 using a one-way Fisher's exact test (**Table 2**). We conclude that  
234 especially for specific asymmetric leaf features (defined by PCs 2 and 3 in this particular case)  
235 the distichous phyllotactic condition in common ivy confers an alternating, mirrored asymmetry  
236 to successive leaves, as predicted by modeling (**Figure 2F**).

237

238 Next, we analyzed >3,000 leaf pairs from 20 different *Vitis* and *Ampelopsis* species and hybrids  
239 from a germplasm collection maintained by the USDA in Geneva, NY (USA). This previously  
240 published dataset [20] analyzed leaf shape in >270 vines by collecting all the leaves from a  
241 single shoot and recording their order (**Figure 5C**). Using 17 homologous landmarks  
242 superimposed using a Procrustes analysis, both symmetric and asymmetric sources of shape  
243 variance are analyzed, but asymmetry is almost exclusively restricted to a specific Principal  
244 Component (PC), in this case PC4 which explains 10.5% of the total shape variance (**Figure**  
245 **5D**). Performing a one-way Fisher's exact test to determine if successive leaf pairs with opposite

246 PC4 signs are more prevalent than same-signed pairs, reveals a strong enrichment of mirrored,  
247 asymmetric leaf pairs across numerous *Vitis* and *Ampelopsis* species and some hybrids (**Table 3**).  
248 Our results demonstrate that although not necessarily apparent at first glance, grapevine and  
249 related species exhibit strong alternating asymmetries in successive leaves (**Figure 5C-D; Table**  
250 **3**) consistent with the predictions from models of auxin flux in distichous systems (**Figure 2F**).

251

## 252 DISCUSSION

253 Although they are strikingly different patterning events, our results elucidate common themes  
254 between the asymmetries that arise in spiral, decussate, and distichous phyllotaxis (**Figure 6**). In  
255 spiral systems, the peak auxin concentration is displaced towards the descending side of the  
256 center of mass of leaf primordia, resulting in a distal shift of morphological features (including  
257 leaflet placement and terminal leaflet shape) in mature leaves. The distal shift of morphological  
258 features is observed empirically in leaf primordia that lunge towards the ascending side due to  
259 increased growth along their descending edge (**Figure 6A**) [5], reminiscent of the curvatures  
260 seen in more extremely asymmetric leaved species, such as leaf shape in *Calathea* or the  
261 positioning of serrations in holly [7, 21]. A similar scenario occurs in decussate and distichous  
262 systems, except that deviation in divergence angles creates angles less than 180° that, when  
263 accompanied by shifts in auxin peak concentrations that remain truer to 180°, creates mirrored  
264 morphologies in leaf pairs (**Figure 2F; Figure 6B-D**). The mirrored relationship between leaf  
265 pairs is strikingly observed in the left-right displacement of leaflets in the leaves of the decussate  
266 tomato mutant *entire-2* (**Figure 3**) but not in the shape of the terminal leaflets (**Figure 4; Table**  
267 **1**), perhaps reflecting that tomato is inherently spirally phyllotactic and not all leaf features  
268 reflect the transition to decussate phyllotaxy this mutation confers. Two different vine species,

269 common ivy and grapevine and its relatives, are statistically over-represented for opposite-signed  
270 leaf asymmetries compared to same-signed asymmetries (**Figure 5; Tables 2-3**), grapevine  
271 particularly so, again confirming the mirrored relationship predicted in the distichous model  
272 (**Figure 2F**).

273

274 Although we have focused on leaf shape, it is important to remember that auxin potentially  
275 impacts many more features of the leaf than just shape, or that leaf shape is a read-out of other  
276 underlying asymmetries at the cellular and tissue levels [15, 22, 23]. Further, it is possible that  
277 the patterning of auxin itself is influenced by properties specific to particular shoot apical  
278 meristem architectures. In this regard, it is important that the underlying developmental causes of  
279 leaf asymmetry be examined further. For example, the archetypal left-right leaf asymmetry of  
280 extreme midrib and blade curvature and spiraling seen in distichous *Begonia spp.* leaf pairs  
281 (**Figure 2G**) is apparent in very early primordia [24, 25]. In fact, in *Begonia* mirrored asymmetry  
282 appears to be the null condition, and symmetric *Begonia* have asymmetric primordia that become  
283 symmetric subsequently during development [24]. If leaf primordia are inherently asymmetric  
284 and symmetry is a result of secondary development, it is perhaps not so surprising that  
285 morphometric methods can statistically detect directional asymmetries in superficially symmetric  
286 species. We also note that the shoot apical meristem of grapevine and related species is  
287 dorsiventrally patterned perpendicular to the axis of distichous leaf initiation [26]. Different  
288 numbers of vascular traces enter the leaves on the dorsal and ventral sides of the shoot, which in  
289 the context of distichous phyllotaxy, creates an inherent mirrored asymmetry in vascular  
290 patterning, perhaps explaining the extremely strong mirrored asymmetry we observe in  
291 grapevine (**Table 3**).

292

293 Different phyllotactic systems—spiral, decussate, and distichous, among others—create  
294 inherently different spatial relationships between leaf primordia in the shoot apical meristem.  
295 The flux of auxin between leaf primordia especially accentuates differences along the left-right  
296 axis. Considering the global roles that auxin plays in vascular patterning and leaf shape, it is  
297 impressive that most leaves appear as bilaterally symmetric as they do. Our results clearly  
298 demonstrate that left-right leaf asymmetry, reflecting predicted auxin asymmetries in the shoot  
299 apical meristem, is influenced by phyllotaxy and present in diverse species.

300

## 301 MATERIALS AND METHODS

302 This work was conducted in parallel and together with our work on spiral phyllotaxy [5]. Some  
303 of the materials and methods from Chitwood, Headland et al., 2012 and Chitwood et al., 2016  
304 are repeated here for convenience.

305

### 306 **Plant Material and Growth and Conditions**

307 *Solanum lycopersicum* accession LA3475 (cv. M82) was used for “wild-type” tomato  
308 measurements. The *entire-2* accession used for this study is 3-705. Tomato resources were  
309 obtained from the U.C. Davis Tomato Genetics Resource Center (TGRC). Tomato seed was  
310 sterilized for 2 minutes in 50% bleach, washed in water, and plated onto wet paper towels in  
311 Phytatrays (Sigma). Seed was kept at room temperature in darkness for 3 days and then  
312 transferred to chamber conditions in light for an additional three days before transplanting into  
313 Sunshine soil mix (Sun-Gro Horiculture). For measures of leaflet positioning and terminal leaflet  
314 shape, tomato plants were analyzed 33 days after plating seed.

315

316 Common ivy leaves (*Hedera helix*) were obtained from a single genotype of vine growing up  
317 >6m walls enclosing a courtyard at the Donald Danforth Plant Science Center in St. Louis, MO  
318 December 28, 2015. Documentation of the site location and material collected can be found in  
319 the following link (<https://twitter.com/DanChitwood/status/681554095618965504>). The leaves  
320 from 41 vines, with up to 25 leaves each, were dissected from the shoot and scanned.

321  
322 Leaves from 20 different grapevine species and hybrids (*Vitis* and *Ampelopsis* spp.) were  
323 collected from >270 vines in the USDA *Vitis* germplasm collection in Geneva, NY in June 2013  
324 [20]. A single shoot was sampled from each vine, the leaves dissected, scanned, and their  
325 position in the shoot noted.

326

### 327 ***Measures of lateral leaflet displacement and asymmetric shape***

328 Measurements of lateral leaflet position and terminal leaflet shape in tomato were made from  
329 photographs. The first four leaves of tomato plants were dissected, placed under non-reflective  
330 glass, and their terminal leaflets removed at the base. Photos of the leaf series were taken using  
331 Olympus SP-500 UZ cameras mounted on copy stands (Adorama, 36'' Deluxe Copy Stand) and  
332 controlled remotely by computer using Cam2Com software (Sabsik). Leaves from ivy and  
333 grapevine were dissected from the shoot and scanned (Epson Workforce DS-50000, Suwa,  
334 Japan). Care was taken to include the node position of each leaf in the scan.

335

336 In tomato, measures of the distance from the base of the terminal leaflet or the petiole to the most  
337 distal and proximal leaflets were made using measurement functions in ImageJ. Lengths were  
338 normalized using rulers present in each photograph. For shape analysis in tomato and ivy,

339 photographs were first converted to binary form using ImageJ and individual leaflets extracted  
340 from the leaf series and named appropriately as separate files.

341  
342 The analysis of tomato and ivy leaflet and leaf shape (respectively) was conducted using  
343 Elliptical Fourier Descriptors followed by PCA using the program SHAPE [27]. Object contours  
344 were extracted as chain-code. Chain-code was subsequently used to calculate normalized EFDs.  
345 Normalization was based upon manual orientation with respect to the proximal-distal axis of the  
346 leaflet/leaf. Principal component analysis was performed on the EFDs resulting from the first 20  
347 harmonics of Fourier coefficients. Only asymmetric sources of shape variance were analyzed  
348 using the *b* and *c* coefficients [28]. Coefficients of Elliptical Fourier Descriptors were calculated  
349 at -2 and +2 standard deviations for each principal component and the respective contour shapes  
350 reconstructed from an inverse Fourier transformation. PCs were then subsequently analyzed.

351  
352 For grapevine data, 17 landmarks were placed, in order, for each leaf using the ImageJ [29] point  
353 tool. Landmarks and their order were as follows: 1) petiolar junction, 2) midvein tip, 3) left distal  
354 sinus, 4) right distal sinus, 5) left distal lobe tip, 6) right distal lobe tip, 7) left proximal sinus, 8)  
355 right proximal sinus, 9) left proximal lobe tip, 10) right proximal lobe tip, 11) left terminus  
356 petiolar vein, 12) right terminus petiolar vein, 13) branch point midvein, 14) branch point left  
357 distal vein, 15) branch point right distal vein, 16) branch point left proximal vein, 17) branch  
358 point right proximal vein (see Chitwood et al., 2016 for a visualization of landmark position).  
359 Using ggplot2 [30] in R [31], graphs for landmarks from each image were visually checked for  
360 errors. If errors were detected, the landmarking was redone for those particular samples. Once a  
361 quality landmarked dataset was created, a Generalized Procrustes Analysis (GPA) was  
362 undertaken using the R package shapes [32]. Eigenleaves were visualized using the shapepca

363 function and PC scores, percent variance explained by each PC, and Procrustes-adjusted  
364 coordinates were obtained from procGPA object values.

365

### 366 *Statistical analysis*

367 All basic statistic functions were performed in R [31] and visualized in the package ggplot2 [30].

368 The cor.test() function in the stats package was used for all correlation analyses using method =

369 “pearson”. Fisher’s exact test was performed using fisher.test() and the one-way test used to

370 determine if the odds ratio of opposite-to-same orientations was greater than 1 by setting

371 alternative = “greater”.

372

### 373 *Auxin transport modeling*

374 The simulation models have been described previously [5], however we summarize here for

375 completeness. Cells are modelled as polygons on a growing apex surface and thus are assumed to

376 be uniform in thickness. Extracellular space is ignored, and diffusion and transport occur directly

377 from cell to cell. The change in concentration of auxin in a cell is modeled as:

$$\begin{aligned} d[IAA_i] &= \text{production} - \text{decay} + \text{diffusion} + \text{transport} \\ &= \frac{\rho}{1+\kappa_{IAA}[IAA_i]} - \mu[IAA_i] + \frac{D}{A_i} \sum_{j \in N_i} l_{i \rightarrow j} ([IAA_j] - [IAA_i]) \\ &\quad + \frac{T}{A_i} \sum_{j \in N_i} \left( PIN_{j \rightarrow i} \frac{b_T^{[IAA_j]} - 1}{b_T^{[IAA_i]}} - PIN_{i \rightarrow j} \frac{b_T^{[IAA_i]} - 1}{b_T^{[IAA_j]}} \right) \end{aligned} \quad (1)$$

379

380 where  $[IAA_i]$  is the concentration of auxin in cell  $i$ ,  $\rho$  controls the rate of production with

381 saturation coefficient  $\kappa_{IAA}$ ,  $\mu$  controls decay,  $D$  is the diffusion coefficient,  $A_i$  is the area of cell  $i$ ,

382  $N_i$  are the neighbours of cell  $i$ ,  $l_{i \rightarrow j}$  is the length of the wall between cell  $i$  and  $j$ ,  $T$  is the transport

383 coefficient,  $PIN_{i \rightarrow j}$  is the amount of PIN on the membrane of cell  $i$  facing cell  $j$ , and  $b_T$  is the

384 base for exponential transport. Equation (1) was used for the decussate simulation, but in the



385 distichous simulation we used the original quadratic transport term from Smith et al. (2006) [13]:

386

$$387 \quad \frac{T}{A_i} \sum_{j \in N_i} (PIN_{j \rightarrow i} \frac{[IAA_j]^2}{[IAA_i]^2 + \kappa_T} - PIN_{i \rightarrow j} \frac{[IAA_i]^2}{[IAA_j]^2 + \kappa_T}) \quad (2)$$

388

389 where  $\kappa_T$  controls saturation of auxin transport. We model PIN allocation to the membranes as:

390

$$391 \quad PIN_{i \rightarrow j} = [PIN_i] \frac{l_{i \rightarrow j} b_{PIN}^{[IAA_j]}}{\sum_{k \in N_i} l_{i \rightarrow k} b_{PIN}^{[IAA_k]}} \quad (3)$$

392

393 where  $[PIN_i]$  is the total amount of PIN in cell  $i$ , and  $b_{PIN}$  is the base for exponential PIN

394 allocation to cell membrane sections. Equations (1-3) were implemented on the growing

395 cellular template as described in Smith et al. (2006) [13]. Simulations were performed using

396 Vertex-Vertex systems [33] in the Vlab modeling environment [34].

397

## 398 ACKNOWLEDGEMENTS

399 C.C.M was supported by a National Science Foundation Graduate Research Fellowship (DGE-

400 1148897), Katherine Esau Summer Fellowship, Walter R. and Roselinde H. Russell Fellowship,

401 and Elsie Taylor Stocking Fellowship. Part of the work was supported by NSF PGRP grant IOS-

402 0820854 (to N.R.S., Julin Maloof and Jie Peng). Funding for R.S.S. was provided by the

403 SystemsX.ch Plant Growth Research, Technology, and Development project and the Max Planck

404 Society.

405

## 406 AUTHOR CONTRIBUTIONS

407 C.C.M, D.H.C, R.S.S, & N.R.S designed the experiments, performed the experiments, analyzed

408 the data and wrote the paper.

409

## 410 FIGURE AND TABLE LEGENDS

411 **Figure 1: Leaf morphology is defined by four axes and the position of the leaf is defined by**  
412 **phyllotaxis.** A) Schematic describing three developmental axes of a leaf. The medio-lateral axis  
413 describes the mid-vein to margin region of a leaf. The adaxial-abaxial axis defines the top and  
414 bottom of the leaf, respectively. The distal-proximal axis refers to the leaf tip relative to the base.  
415 B-C) The descending and ascending axis of a leaf refers to the left and right sides of the leaf in  
416 relation to spiral phyllotactic patterning. Spiral phyllotaxy can be further defined as Clockwise  
417 (C) or Counter-Clockwise (CC). The ascending side of the leaf faces the direction of younger  
418 leaves, while the descending side faces older leaves. D) When the divergence angle between  
419 each leaf is  $\sim 137.5^\circ$  the phyllotaxis is defined as spiral. Decussate phyllotaxis refers to leaf  
420 initiation patterning where leaves initiate in pairs  $180^\circ$  apart, with  $90^\circ$  between each successive  
421 pair (literally “crossed”). F) Distichous phyllotaxis occurs when leaves initiate one at a time  
422  $180^\circ$  apart (literally “of two rows”).

423

424 **Figure 2: Models of decussate and distichous phyllotaxis predict reflection within leaf**  
425 **pairs.** A) Pairs of leaves from decussate and distichous phyllotactic simulations were analyzed  
426 such that all pairs have positive divergence angles. IAA Shift values in auxin concentration are  
427 then analyzed for “primordium A” and “primordium B” as indicated in purple and blue dotted  
428 lines, respectively. Sign (+ or -) and direction (C, clockwise and CC, counter-clockwise) of IAA  
429 Shift values are as indicated. B-C) Diagrams demonstrating the relative mirrored relationships  
430 between primordia pairs if IAA Shift values share the same sign and direction (B, “pinwheel,”  
431 ++ or --) or are opposite in sign (C, “mirror,” +- or -+). D-F) As divergence angles deviate from  
432  $180^\circ$  and become smaller, auxin peak concentrations remain truer to an idealized  $180^\circ$  angle. As  
433 the divergence angle decreases, primordium A IAA Shift values decrease, whereas IAA Shift

434 values increase under similar conditions for primordium B, such that the discrepancy between  
435 auxin and primordia center of masses are mirrored between the two primordia. Results from **D)**  
436 decussate and **F)** distichous models are shown, as well as **E)** an image from the decussate model  
437 showing primordia (white) and auxin (green) center of masses. **G)** *Begonia* species are excellent  
438 examples of reflected, mirrored leaf morphology between distichous leaf pairs, which sometimes  
439 manifests as a spiral morphology (lower panel).

440

441 **Figure 3: The decussate-like mutant *e-2*.** **A)** Relative to a WT background genotype, *entire-2*  
442 (*e-2*) exhibits decussate-like phyllotactic patterning. Leaflets have been removed to better view  
443 divergence angles. **B)** Between leaf pairs 1/2 and 3/4 *e-2* divergence angles more closely  
444 approximate 180° compared to background genotype. **C)** “L” and “R” depict the lengths  
445 measured to analyze shifts in lateral leaflet positioning on leaf 1 ( $L_1 - R_1$ ) and leaf 2 ( $L_2 - R_2$ ). **D)**  
446 Lateral leaflets on the left and right sides of leaves show a significant negative correlation in the  
447 lateral leaflet positioning between leaves 1 and 2, indicative of a mirrored relationship between  
448 leaf pairs.

449

450 **Figure 4: Morphometric analysis of *e-2* terminal leaflets.** **A)** Distal bulges in terminal leaflet  
451 laminae in the *e-2* mutant background occur either on opposite sides of leaf 1/2 pairs or on the  
452 same side. **B)** Principal Components (PCs) representing asymmetric shape variance using  
453 Elliptical Fourier Descriptors (EFDs). Negative PC standard deviation values are of opposite  
454 asymmetric orientation compared to positive values. Percent asymmetric shape variance  
455 explained by each PC is provided.

456

457 **Figure 5: Morphometric analysis of ivy and grapevine leaves.** A) An example of leaf outlines  
458 analyzed from a shoot of common ivy (*Hedera helix*). Shoot tip and base are indicated. B)  
459 Principal Components (PCs) representing asymmetric shape variance using Elliptical Fourier  
460 Descriptors (EFDs). Negative PC standard deviation values are of opposite asymmetric  
461 orientation compared to positive values. Percent asymmetric shape variance explained by each  
462 PC is provided. C) An example of leaf outlines analyzed from a grapevine shoot (specifically,  
463 *Vitis xdoaniana*, for which each of the nine leaf pairs have an opposite orientation, see **Table 4**).  
464 The analyzable leaf pairs for a shoot equals  $n-1$ , where  $n$  = total leaf number. In this study, 20  
465 different *Vitis* and *Ampelopsis* (a closely-related genus to *Vitis*) species and hybrids were  
466 analyzed. D) PCs representing shape variance in 17 Procrustes-adjusted homologous landmarks.  
467 Note that almost all asymmetric shape variance is restricted to PC4, explaining 10.5% of total  
468 shape variance, which is analyzed in **Table 4**.

469

470 **Figure 6: Summary of leaf asymmetry in spiral, decussate, and distichous systems.** The  
471 discrepancy between the peak concentration of auxin (blue) and the respective primordium  
472 center of mass (black) is such that the auxin falls towards a more idealized phyllotactic position.  
473 In both A) spiral and B-D) decussate/distichous systems, this results in the distal shifting of  
474 morphological features (such as leaflets, terminal leaflet lobes) and increase laminar outgrowth  
475 on the side of the primordium with greater auxin concentration. Asymmetries early in leaf  
476 development manifest as the shifting of distal features on the descending side of mature leaves in  
477 spiral systems and mirroring of leaf features in decussate/distichous systems.

478

479 **Table 1: Opposite vs. same orientation in  $e-2$  leaf1/leaf2 pairs**

| PC  | Variance | Opposite | Same | n   | Ratio | p value |
|-----|----------|----------|------|-----|-------|---------|
| PC1 | 52.0%    | 89       | 94   | 183 | 0.95  | 0.64    |
| PC2 | 13.6%    | 87       | 96   | 183 | 0.91  | 0.72    |
| PC3 | 9.1%     | 80       | 103  | 183 | 0.78  | 0.91    |
| PC4 | 4.8%     | 89       | 94   | 183 | 0.95  | 0.64    |

480 For each PC representing asymmetric shape variance in the terminal leaflets of *e-2* (**Figure 4B**),  
481 the number of leaflet pairs with opposite vs. same PC sign, the number of leaf pairs, the ratio of  
482 the number of opposite-to-same pairs, and the p-value for the one-sided exact test that the odds  
483 ratio of opposite-to-same pairs exceeds 1 are provided.

484

485 **Table 2: Opposite vs. same orientation in common ivy (*Hedera helix*) leaf pairs**

486

| PC  | Variance | Opposite | Same | n   | Ratio | p value |
|-----|----------|----------|------|-----|-------|---------|
| PC1 | 61.1%    | 430      | 394  | 824 | 1.09  | 0.2011  |
| PC2 | 11.4%    | 462      | 362  | 824 | 1.28  | 0.0078  |
| PC3 | 9.8%     | 451      | 373  | 824 | 1.21  | 0.0304  |
| PC4 | 5.2%     | 437      | 387  | 824 | 1.13  | 0.1184  |

487 For each PC representing asymmetric shape variance in ivy leaves (**Figure 5B**), the number of  
488 leaf pairs with opposite vs. same PC sign, the number of leaf pairs, the ratio of the number of  
489 opposite-to-same pairs, and the p-value for the one-sided exact test that the odds ratio of  
490 opposite-to-same pairs exceeds 1 are provided.

491

492 **Table 3: Opposite vs. same orientation in grapevine (*Vitis* and *Ampelopsis* spp.) leaf pairs**

493

| Species                        | Opposite | Same | n   | Ratio | p value   |
|--------------------------------|----------|------|-----|-------|-----------|
| <i>Vitis riparia</i>           | 646      | 197  | 843 | 3.28  | 2.20E-16  |
| <i>Vitis labrusca</i>          | 287      | 96   | 383 | 2.99  | 6.01E-13  |
| <i>Vitis cinerea</i>           | 268      | 92   | 360 | 2.91  | 8.40E-12  |
| <i>Vitis rupestris</i>         | 201      | 102  | 303 | 1.97  | 3.08E-05  |
| <i>Vitis acerifolia</i>        | 165      | 44   | 209 | 3.75  | 3.85E-10  |
| <i>Vitis amurensis</i>         | 146      | 61   | 207 | 2.39  | 1.40E-05  |
| Unidentified <i>Vitis</i> spp. | 143      | 59   | 202 | 2.42  | 1.41E-05  |
| <i>Vitis vulpina</i>           | 108      | 47   | 155 | 2.30  | 0.0002962 |
| <i>Vitis aestivalis</i>        | 70       | 26   | 96  | 2.69  | 0.0008781 |
| <i>Vitis coignetiae</i>        | 37       | 21   | 58  | 1.76  | 0.09458   |
| <i>Ampelopsis</i>              |          |      |     |       |           |
| <i>glandulosa</i>              | 38       | 9    | 47  | 4.22  | 0.001473  |
| <i>Vitis palmata</i>           | 27       | 18   | 45  | 1.50  | 0.2274    |
| <i>Vitis xchampinii</i>        | 26       | 6    | 32  | 4.33  | 0.008431  |
| <i>Vitis piasezkii</i>         | 15       | 9    | 24  | 1.67  | 0.2806    |
| <i>Ampelopsis cordata</i>      | 6        | 5    | 11  | 1.20  | 0.5789    |
| <i>Vitis thunbergii</i>        | 6        | 5    | 11  | 1.20  | 0.5789    |
| <i>Vitis xandersonii</i>       | 9        | 1    | 10  | 9.00  | 0.07043   |
| <i>Ampelopsis</i>              | 4        | 5    | 9   | 0.80  | 0.7578    |

*aconitifolia*

|                             |   |   |   |      |         |
|-----------------------------|---|---|---|------|---------|
| <i>Vitis xdoaniana</i>      | 9 | 0 | 9 | Inf  | 0.02167 |
| <i>Vitis xnovae-angliae</i> | 5 | 2 | 7 | 2.50 | 0.3776  |

494 For different *Vitis* and *Ampelopsis* species, and *Vitis* hybrids, the number of leaf pairs with  
495 opposite vs. same PC4 sign (**Figure 5D**), the number of leaf pairs, the ratio of the number of  
496 opposite-to-same pairs, and the p-value for the one-sided exact test that the odds ratio of  
497 opposite-to-same pairs exceeds 1 are provided.

498

499 REFERENCES

- 500 1. Miller AP (1995) Leaf-Mining Insects and Fluctuating Asymmetry in Elm *Ulmus glabra*  
501 Leaves. *J Anim Ecol* 64:697–707
- 502 2. Kozlov MV, Wilsey BJ, Koricheva J, Haukioja E (1996) Fluctuating Asymmetry of Birch  
503 Leaves Increases Under Pollution Impact. *J Appl Ecol* 33:1489–1495
- 504 3. Hódar JA (2002) Leaf fluctuating asymmetry of Holm oak in response to drought under  
505 contrasting climatic conditions. *J Arid Environ* 52:233–243
- 506 4. Klingenberg C (2015) Analyzing Fluctuating Asymmetry with Geometric Morphometrics:  
507 Concepts, Methods, and Applications. *Symmetry* 7:843–934
- 508 5. Chitwood DH, Headland LR, Ranjan A, Martinez CC, Braybrook S a., Koenig DP,  
509 Kuhlemeier C, Smith RS, Sinha NR (2012) Leaf Asymmetry as a Developmental  
510 Constraint Imposed by Auxin-Dependent Phyllotactic Patterning. *Plant Cell* 24:1–10
- 511 6. Chitwood DH, Naylor DT, Thammaphichai P, Weeger ACS, Headland LR, Sinha NR  
512 (2012) Conflict between Intrinsic Leaf Asymmetry and Phyllotaxis in the Resupinate  
513 Leaves of *Alstroemeria psittacina*. *Front Plant Sci* 3:182
- 514 7. Korn RW (2006) Anodic asymmetry of leaves and flowers and its relationship to  
515 phyllotaxis. *Ann Bot* 97:1011–1015
- 516 8. Skutch AF (1927) Anatomy of Leaf of Banana, *Musa sapientum* L. var. Hort. Gros Michel.  
517 *Bot Gaz* 84:337–391
- 518 9. Macloskie G (1895) Antidromy in Plants. *Am Nat* 29:973–978

- 519 10. Raunkiær C (1919) Über Homodromie und Antidromie insbesondere bei Gramineen. Andr.  
520 Fred. Høst & søn, Bianco Lunos bogtrykkeri
- 521 11. Dormer KJ (1972) Shoot Organization in Vascular Plants. Syracuse University Press
- 522 12. Reinhardt D, Pesce E-R, Stieger P, Mandel T, Baltensperger K, Bennett M, Traas J, Friml  
523 J, Kuhlemeier C (2003) Regulation of phyllotaxis by polar auxin transport. Nature  
524 426:255–260
- 525 13. Smith RS, Guyomarc’h S, Mandel T, Reinhardt D, Kuhlemeier C, Prusinkiewicz P (2006)  
526 A plausible model of phyllotaxis. Proc Natl Acad Sci U S A 103:1301–1306
- 527 14. Scarpella E, Barkoulas M, Tsiantis M (2010) Control of leaf and vein development by  
528 auxin. Cold Spring Harb Perspect Biol 2:a001511
- 529 15. Koenig D, Bayer E, Kang J, Kuhlemeier C, Sinha N (2009) Auxin patterns *Solanum*  
530 *lycopersicum* leaf morphogenesis. Development 136:2997–3006
- 531 16. Martinez C, Koenig D, Chitwood DH, Sinha N (2016) A Sister of PIN1 gene in tomato  
532 (*Solanum lycopersicum*) defines organ initiation patterns by maintaining epidermal auxin  
533 flux. bioRxiv 042150
- 534 17. Jönsson H, Heisler MG, Shapiro BE, Meyerowitz EM, Mjolsness E (2006) An auxin-  
535 driven polarized transport model for phyllotaxis. Proc Natl Acad Sci U S A 103:1633–1638
- 536 18. Smith RS (2011) Modeling plant morphogenesis and growth. New Trends in the Physics  
537 and Mechanics of Biological Systems
- 538 19. Giulini A, Wang J, Jackson D (2004) Control of phyllotaxy by the cytokinin-inducible  
539 response regulator homologue ABPHYL1. Nature 430:1031–1034
- 540 20. Chitwood DH, Klein LL, O’Hanlon R, Chacko S, Greg M, Kitchen C, Miller AJ, Londo JP  
541 (2016) Latent developmental and evolutionary shapes embedded within the grapevine leaf.  
542 New Phytol 210:343–355
- 543 21. Dormer KJ, Hucker J (1957) Observations on the Occurrence of Prickles on the Leaves of  
544 *Ilex aquifolium*. Ann Bot 21:385–398
- 545 22. Barkoulas M, Hay A, Kougioumoutzi E, Tsiantis M (2008) A developmental framework  
546 for dissected leaf formation in the *Arabidopsis* relative *Cardamine hirsuta*. Nat Genet  
547 40:1136–1141
- 548 23. Shani E, Ben-Gera H, Shleizer-Burko S, Burko Y, Weiss D, Ori N (2010) Cytokinin  
549 regulates compound leaf development in tomato. Plant Cell 22:3206–3217
- 550 24. Barabé D, Brouillet L, Bertrand C (1992) Organogénie de la feuille du *Begonia radicans*



- 551 Vellozo et du *Begonia scabrida* (Begoniaceae). *Can J Bot* 70:1107–1122
- 552 25. Charlton WA (1993) The rotated-lamina syndrome. III. Cases in *Begonia*, *Corylus*,  
553 *Magnolia*, *Pellionia*, *Prunus*, and *Tilia*. *Can J Bot* 71:229–247
- 554 26. Gerrath J m., Posluszny U, Dengler N g. (2001) Primary Vascular Patterns in the Vitaceae.  
555 *Int J Plant Sci* 162:729–745
- 556 27. Iwata H, Ukai Y (2002) SHAPE: a computer program package for quantitative evaluation  
557 of biological shapes based on elliptic Fourier descriptors. *J Hered* 93:384–385
- 558 28. Iwata H, Niikura S, Matsuura S, Takano Y, Ukai Y Evaluation of variation of root shape of  
559 Japanese radish (*Raphanus sativus* L.) based on image analysis using elliptic Fourier  
560 descriptors. *Euphytica* 102:143–149
- 561 29. Abràmoff MD, Magalhães PJ, Ram SJ (2004) Image processing with ImageJ. *Biophotonics*  
562 *international* 11:36–42
- 563 30. Wickham H (2009) *ggplot2: elegant graphics for data analysis*. Springer Science &  
564 Business Media
- 565 31. Team RC (2014) A language and environment for statistical computing. R Foundation for  
566 Statistical Computing, Vienna.
- 567 32. Dryden IL (2013) *shapes: Statistical shape analysis*. R package version 1.1-1.
- 568 33. Smith RS, Schuepbach T, Nakayama N (2004) MorphoGraphX : A Program for  
569 Quantitative Analysis of Tissue Kinematics and Fluorescence Expression Using 2D  
570 Surface Projections. *Growth* 2004
- 571 34. Federl P, Prusinkiewicz P (1999) Virtual Laboratory: An Interactive Software Environment  
572 for Computer Graphics. In: *Computer Graphics International*. p 93-100

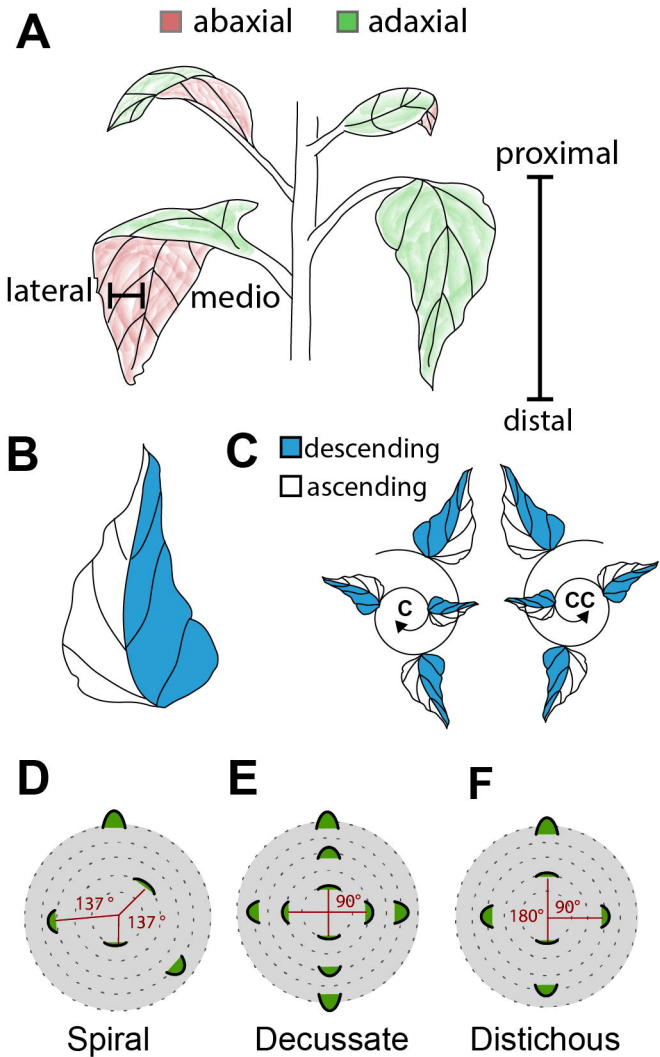

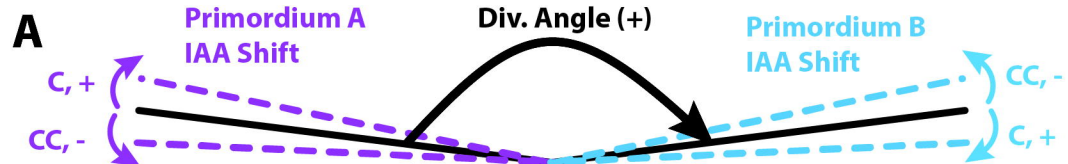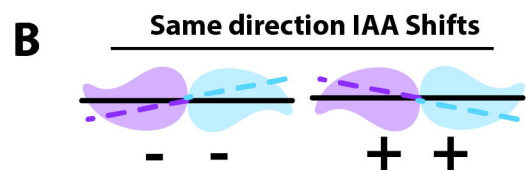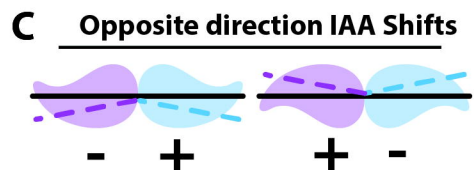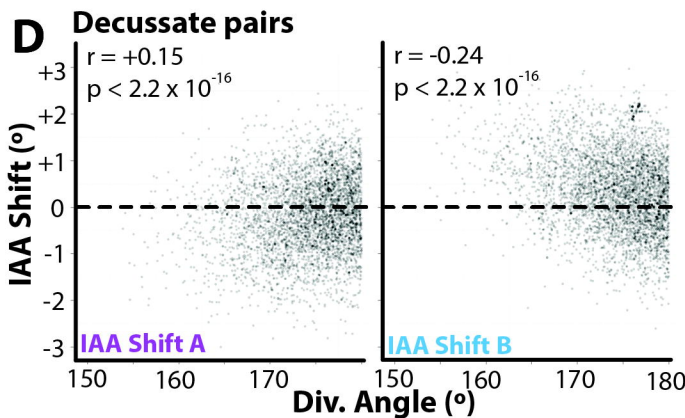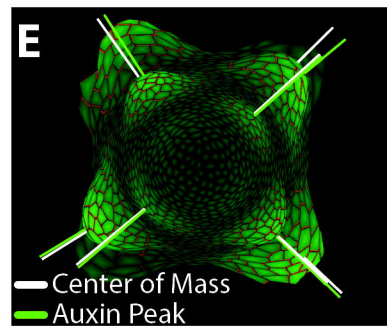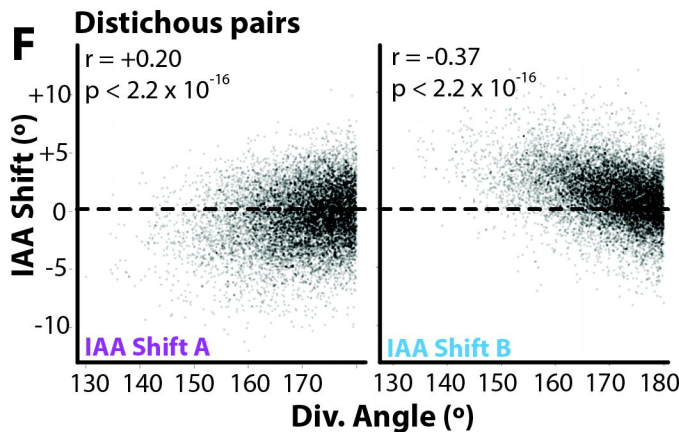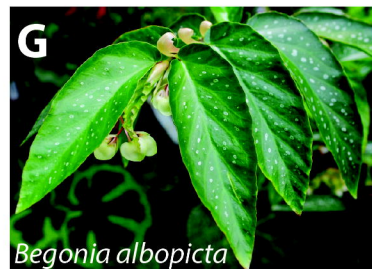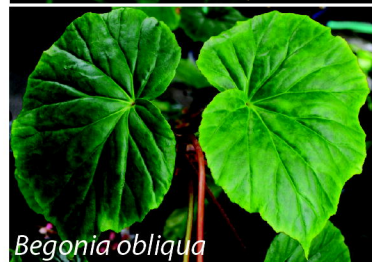

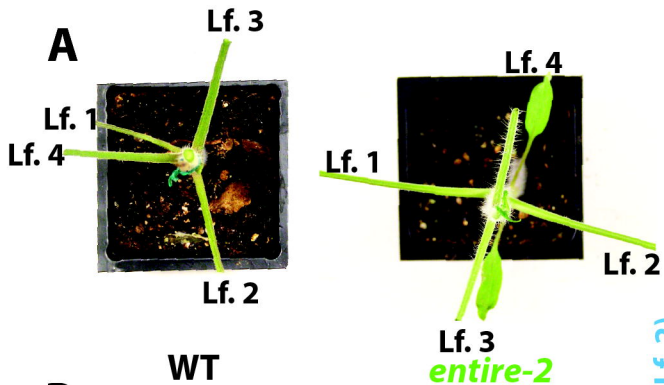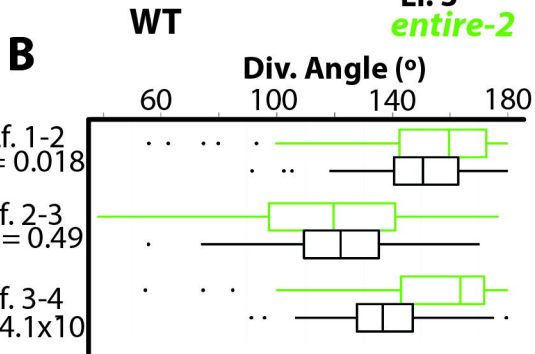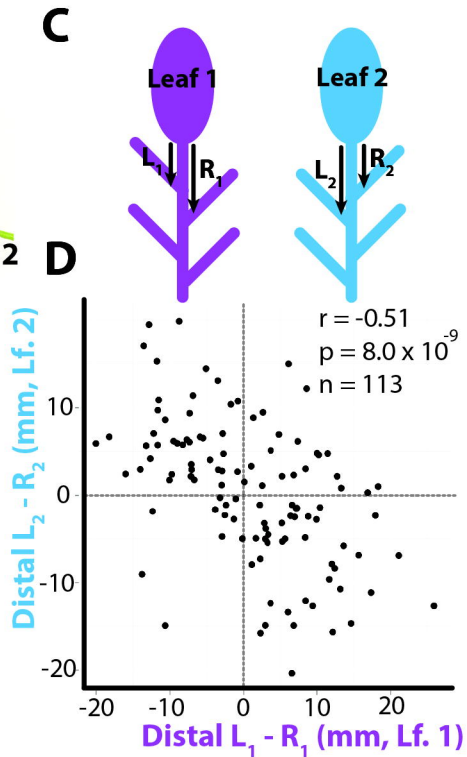

**A**

Opposite

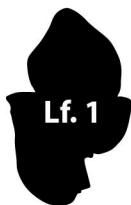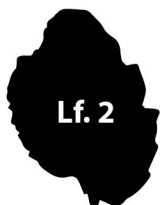

Same

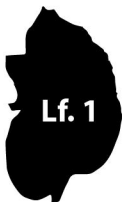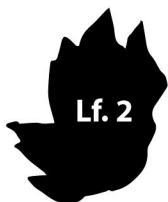**B**-2SD

Mean

+2SD**PC1:**  
52.0%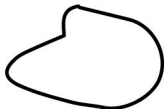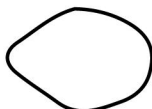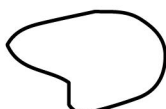**PC2:**  
13.6%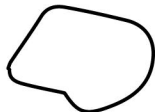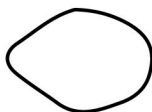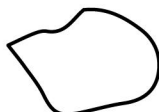**PC3:**  
9.1%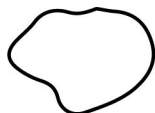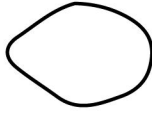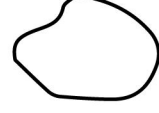**PC4:**  
4.8%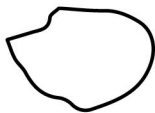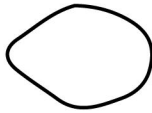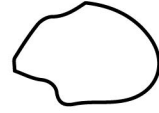

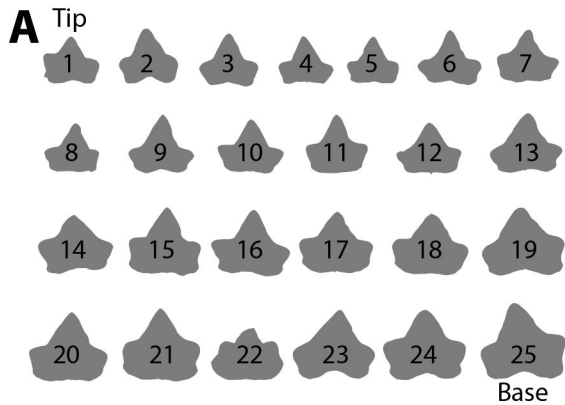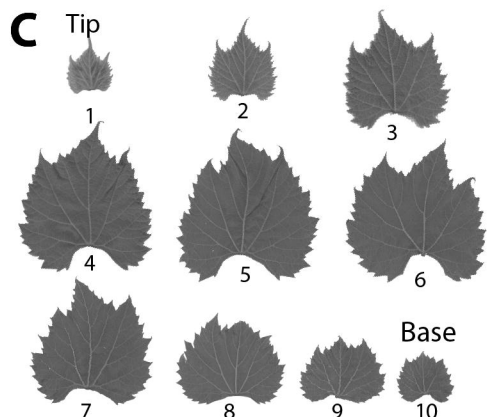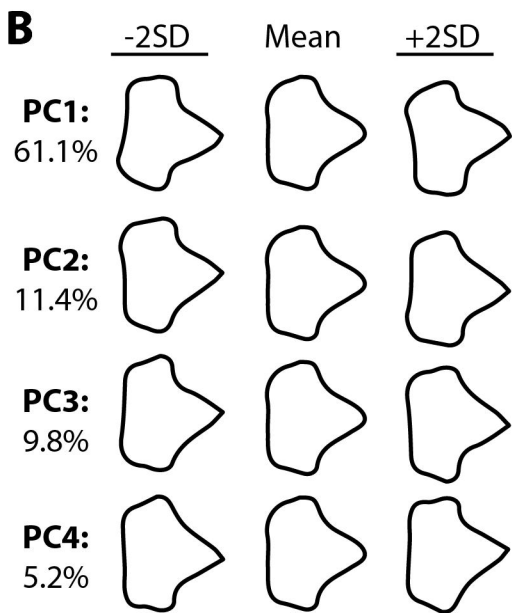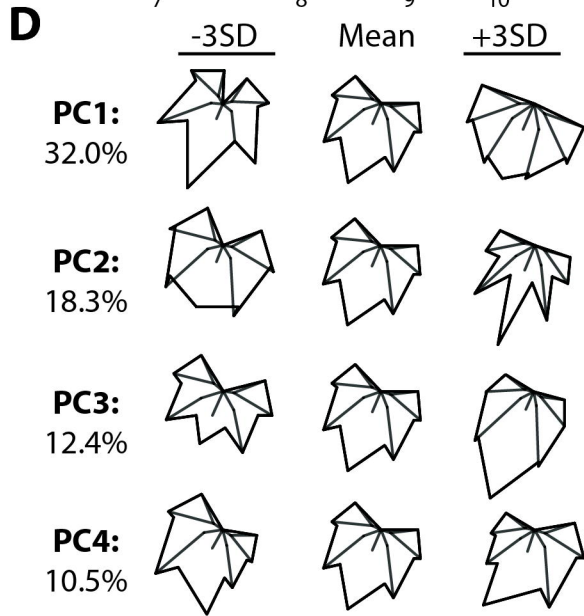

## A. Spiral phyllotaxy

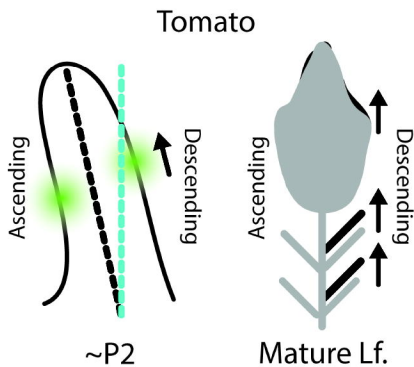

## B. Decussate phyllotaxy

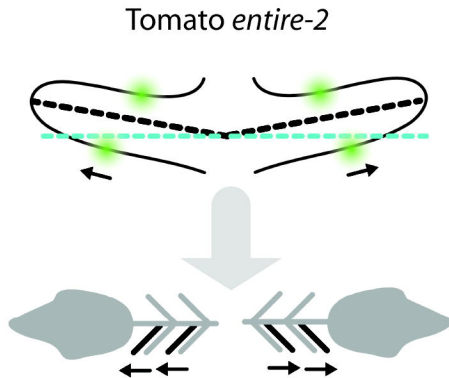

## C. Distichous phyllotaxy

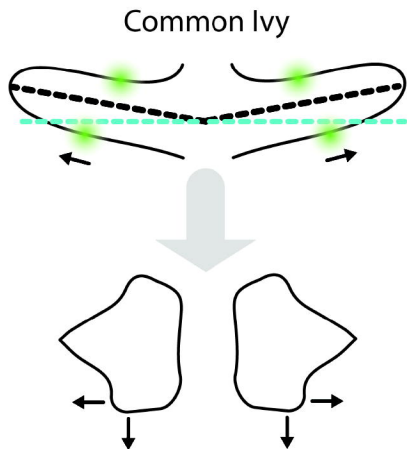

## D. Distichous phyllotaxy

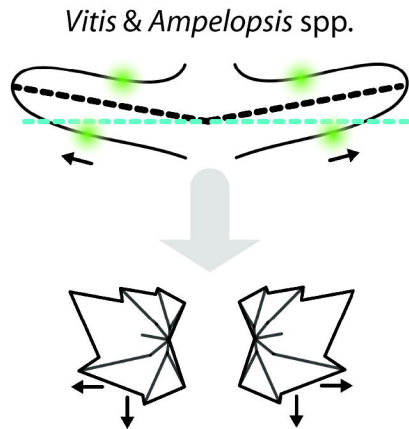

--- Center of mass  
--- Auxin Shift

Auxin maxima shift  
(for leaflet or blade)

→ Morphological shifts
